# Supplementary material for: Enhancing ammonia recovery through pH polarization in bipolar membrane electrodialysis
Source: Royal Society of Chemistry journal article supplement (doi:10.1039/d4va00082j), 2024-01-01
Supplement: d4va00082j1.pdf [file d4va00082j1.pdf]

## Supplementary information for

### Enhancing Ammonia Recovery Efficiency through pH Polarization in Bipolar Membrane Electrodialysis

Sandali Panagoda<sup>1</sup>, Pengyi Yuan<sup>2</sup>, Vladimir Pavlovic<sup>2</sup>, John Barber<sup>2</sup>, Younggy Kim<sup>1\*</sup>

1. Department of Civil Engineering, McMaster University,  
1280 Main Street West, Hamilton, ON, L8S 4L8, Canada.

2. Veolia Water Technologies & Solutions, Canada

\*Corresponding author: younggy@mcmaster.ca; 905-525-9140 x24802

Table S1 Initial and final pH of the reactors used in back-diffusion experiments

|         | Test 1 |      | Test 2 |       | Test 3 |       |
|---------|--------|------|--------|-------|--------|-------|
|         | L      | H    | L      | H     | L      | H     |
| Initial | 6.35   | 6.26 | 13.56  | 11.20 | 6.51   | 11.22 |
|         | ±      | ±    | ±      | ±     | ±      | ±     |
|         | 0.20   | 0.13 | 0.09   | 0.03  | 0.10   | 0.13  |
| Final   | 6.75   | 6.16 | 13.72  | 11.38 | 6.48   | 11.31 |
|         | ±      | ±    | ±      | ±     | ±      | ±     |
|         | 0.10   | 0.11 | 0.09   | 0.13  | 0.12   | 0.27  |

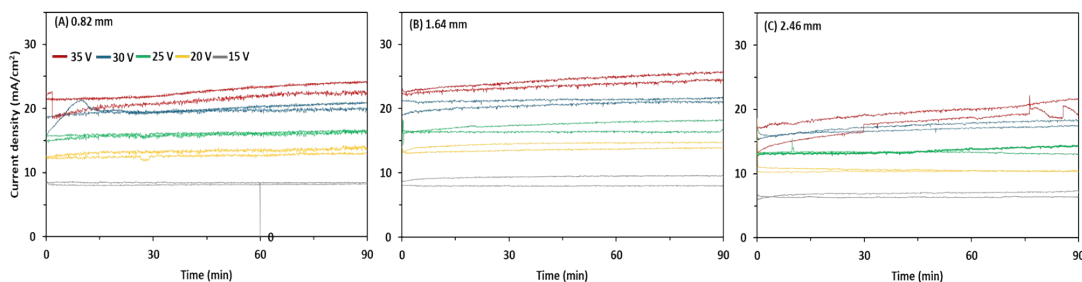

Figure S1 Change in current density over time at different voltage applications with (A) 0.82, (B) 1.64, and (C) 2.46 mm intermembrane distances

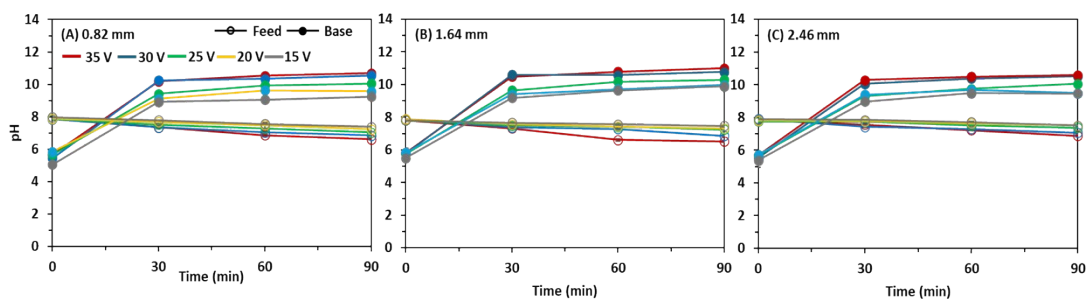

Figure S2 Change in conductivity of feed and base reservoirs over time at different voltage applications with (A) 0.82, (B) 1.64, and (C) 2.46 mm intermembrane distances

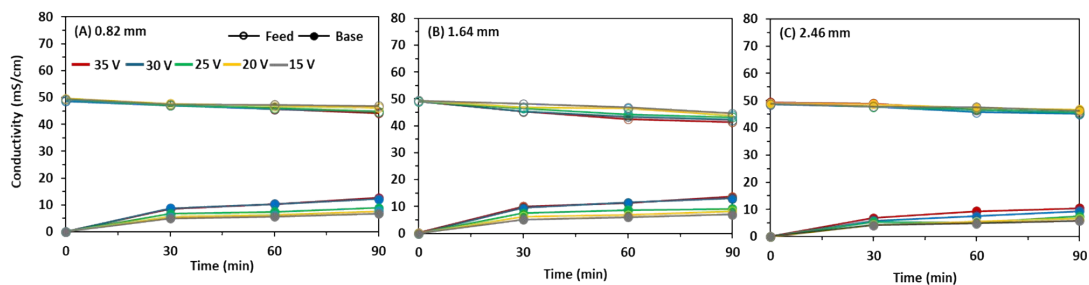

Figure S3 Change in pH of feed and base reservoirs over time at different voltage applications with (A) 0.82, (B) 1.64, and (C) 2.46 mm intermembrane distances

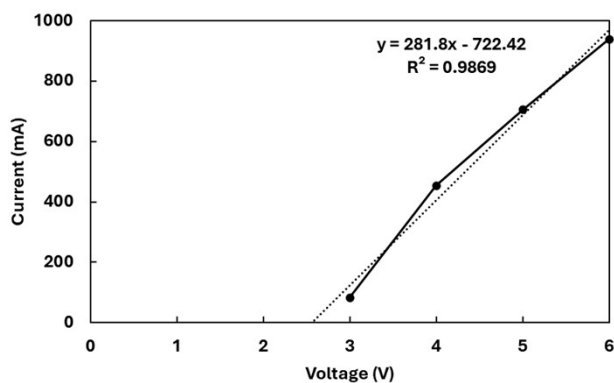

Figure S4 Change of current with voltage for estimation of voltage drop in the electrode rinse cells
